# Supplementary material
Source: publisher figshare collection journal article supplement (https://tandf.figshare.com/ndownloader/files/2352558)
Supplement: Supplementary file 1 [file 2352558]

**Table S1.** Appraisal of methodological quality (Newcastle-Ottawa Scale) of included studies

| Study                                     | Case-cohort<br>representative | Selection of<br>non-exposed<br>control | Ascertainment<br>of exposure | Outcome<br>negative<br>at start | Comparability<br>by design | Comparability<br>by analysis | Outcome<br>assessment | Duration<br>of<br>follow-up | Score |
|-------------------------------------------|-------------------------------|----------------------------------------|------------------------------|---------------------------------|----------------------------|------------------------------|-----------------------|-----------------------------|-------|
| Kim et al., 2008 <sup>[16]</sup>          | *                             | *                                      | *                            | *                               | *                          | *                            | *                     | *                           | 8     |
| Lewandowski et al., 2008 <sup>[17]</sup>  | ×                             | *                                      | *                            | *                               | *                          | *                            | *                     | *                           | 7     |
| Tepper et al., 2010 <sup>[18]</sup>       | *                             | *                                      | *                            | *                               | **                         | *                            | *                     | *                           | 9     |
| Chan et al., 2007 <sup>[19]</sup>         | *                             | *                                      | *                            | *                               | *                          | *                            | *                     | *                           | 8     |
| Liang et al., 2014 <sup>[20]</sup>        | *                             | *                                      | *                            | *                               | *                          | *                            | *                     | *                           | 8     |
| Krzyzanowska et al., 2008 <sup>[21]</sup> | ×                             | *                                      | *                            | *                               | ×                          | ×                            | *                     | *                           | 5     |
| Klein et al., 2010 <sup>[22]</sup>        | *                             | *                                      | *                            | *                               | *                          | *                            | *                     | *                           | 8     |
| Su et al., 2010 <sup>[23]</sup>           | *                             | *                                      | *                            | *                               | *                          | *                            | *                     | *                           | 8     |
| Saucedo et al., 2011 <sup>[24]</sup>      | *                             | *                                      | *                            | *                               | ×                          | ×                            | *                     | *                           | 6     |
| Kuzmicki et al., 2011 <sup>[25]</sup>     | *                             | ×                                      | *                            | *                               | *                          | *                            | *                     | *                           | 7     |
| Maghbooli et al.,                         | *                             | *                                      | *                            | *                               | ×                          | ×                            | *                     | *                           | 6     |

|                                              |   |   |   |   |   |   |   |   |   |   |
|----------------------------------------------|---|---|---|---|---|---|---|---|---|---|
| 2010 <sup>[26]</sup>                         |   |   |   |   |   |   |   |   |   |   |
| Nanda et al.,<br>2013 <sup>[27]</sup>        | * | * | * | * | * | * | * | * | * | 8 |
| Abetew et al.,<br>2013 <sup>[28]</sup>       | * | * | * | * | × | * | * | * | * | 7 |
| Khovidhunkit et<br>al., 2012 <sup>[29]</sup> | * | * | * | * | * | * | * | * | * | 8 |

---

\* Indicates that a feature is present; x, that a feature is absent. But for comparability by design this checklist awards a maximum of two stars (\*\*), one (\*) or none if the feature is completely absent(x).

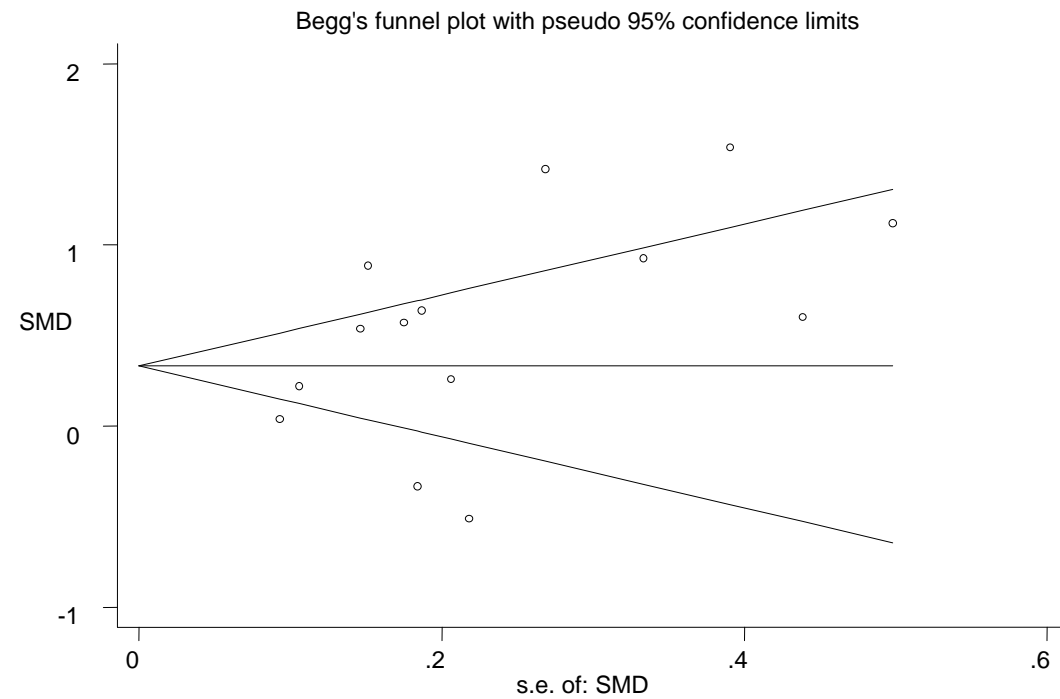

**FIGURE S1**

Begg's funnel plot of standardized mean differences (SMD) in circulating retinol-binding protein 4 between women with gestational diabetes mellitus and normal controls for all the studies included in the meta-analysis ( $P = 0.381$ ).
